# Supplementary material for: A Promising Approach to Quantifying Pteropod Eggs Using Image Analysis and Machine Learning
Source: Frontiers journal article supplement (doi:10.3389/fmars.2022.869252), 2022-04-29
Supplement: Data_Sheet_1.docx [file Data_Sheet_1.docx]

Supplementary Material

# Supplementary Data

## Supplementary Figures


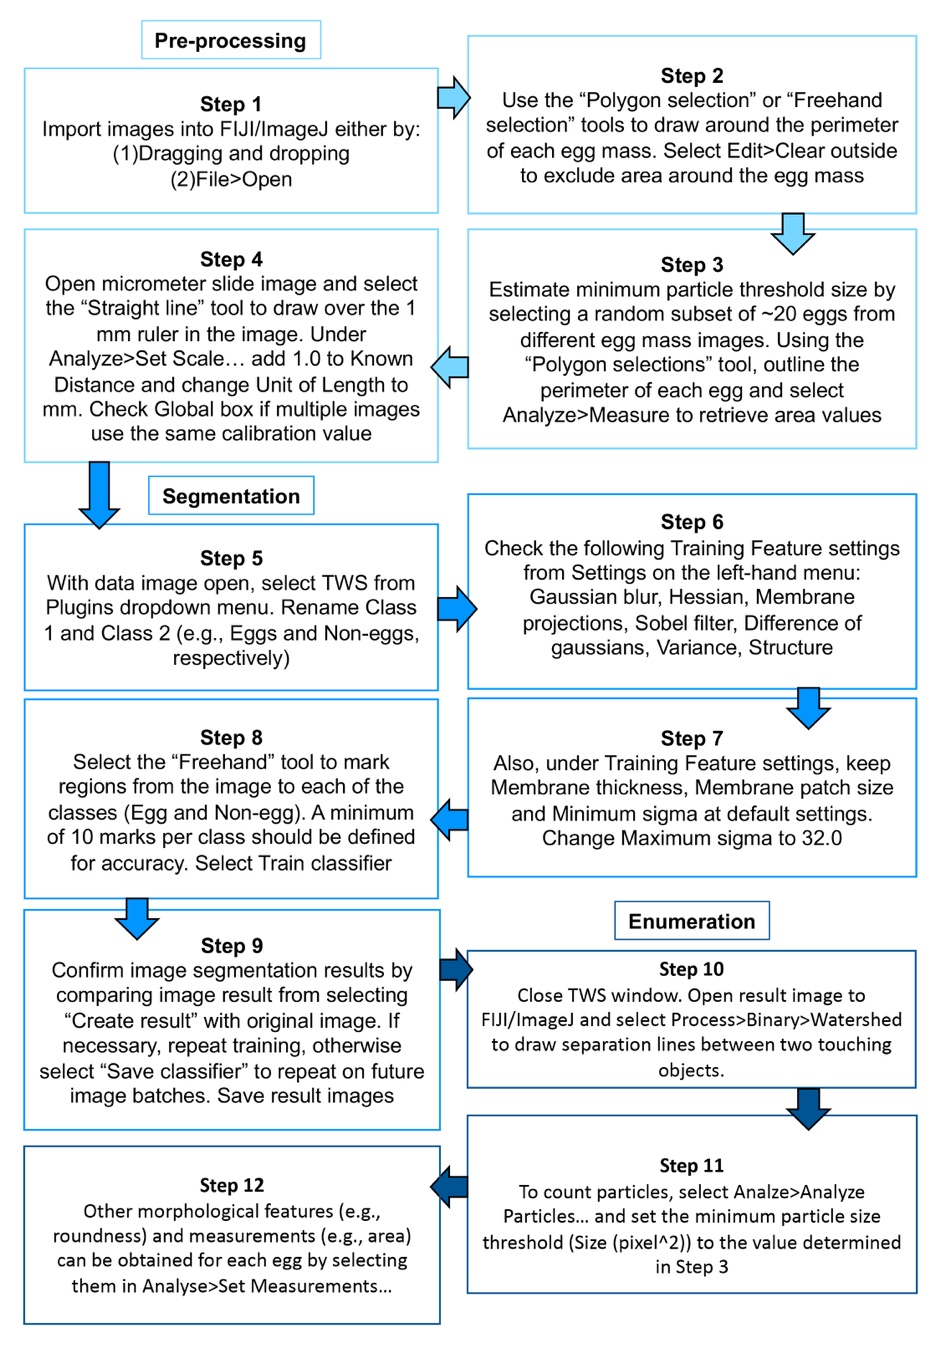


**Supplementary Figure 1.** Detailed semi-automated enumeration workflow from Pre-processing of images in Fiji/ImageJ (Steps 1-4) to Segmentation using the TWS in-built plugin (Steps 5-9) and finally Enumeration of eggs using the ‘Analyze particles…’ feature in Fiji/ImageJ (Steps 10-12).
